# Supplementary material for: Changes in Weight and Substrate Oxidation in Overweight Adults Following Isomaltulose Intake During a 12-Week Weight Loss Intervention: A Randomized, Double-Blind, Controlled Trial
Source: PubMed Central journal article supplement (PMC6836138; doi:10.3390/nu11102367), 2019-10-04
Supplement: nutrients-11-02367-s001.pdf [file nutrients-11-02367-s001.pdf]

**Table S1 Meal composition of the energy-reduced study diets.**

| <b>Meal</b>                 | <b>Meal composition</b>                                                                                                      | <b>Caloric value</b> |
|-----------------------------|------------------------------------------------------------------------------------------------------------------------------|----------------------|
| <b>Breakfast</b>            | Weetabix (shredded wheat biscuits) with semi-skimmed milk<br>+ 10g ISO or 10g SUC                                            | 204 kcal<br>+80 kcal |
| <b>1<sup>st</sup> Snack</b> | Vegetable/fruit                                                                                                              | 100 kcal             |
| <b>Lunch</b>                | Low-calorie sandwich<br>+ 250ml fruit drink containing<br>20g ISO or 20g SUC                                                 | 298 kcal<br>+80 kcal |
| <b>2<sup>nd</sup> Snack</b> | Low-fat yogurt drink containing 10g ISO or 10g SUC                                                                           | 112 kcal             |
| <b>Evening meal</b>         | Ad libitum self-chosen diet. Participants were provided with healthy eating guidelines and a list of low energy dense foods. | ~800 kcal            |

ISO, isomaltulose; SUC, sucrose.

**Table 2.** Macronutrient intakes at week 4, week 8 and week 12 compared to baseline (mean  $\pm$  SD).

|                 | Isomaltulose                    |                                |                                |                               | Sucrose                         |                               |                               |                               |
|-----------------|---------------------------------|--------------------------------|--------------------------------|-------------------------------|---------------------------------|-------------------------------|-------------------------------|-------------------------------|
|                 | Baseline                        | Week 4                         | Week 8                         | Week 12                       | Baseline                        | Week 4                        | Week 8                        | Week 12                       |
| Protein (g/day) | 91.8 $\pm$ 25.3 <sup>a,*</sup>  | 82.7 $\pm$ 13.8 <sup>a,b</sup> | 78.2 $\pm$ 14.3 <sup>a,b</sup> | 76.1 $\pm$ 14.1 <sup>b</sup>  | 71.8 $\pm$ 15.9 <sup>a,*</sup>  | 75.6 $\pm$ 13.3 <sup>a</sup>  | 73.7 $\pm$ 15.7 <sup>a</sup>  | 75.3 $\pm$ 13.6 <sup>a</sup>  |
| Fat (g/day)     | 87.9 $\pm$ 25.3 <sup>a,*</sup>  | 55.8 $\pm$ 31.1 <sup>b</sup>   | 50.9 $\pm$ 21.7 <sup>b</sup>   | 47.9 $\pm$ 18.2 <sup>b</sup>  | 73.5 $\pm$ 22.2 <sup>a,*</sup>  | 49.7 $\pm$ 32.3 <sup>b</sup>  | 43.1 $\pm$ 11.5 <sup>b</sup>  | 40.9 $\pm$ 11.5 <sup>b</sup>  |
| CHO (g/day)     | 262.5 $\pm$ 60.7 <sup>a,*</sup> | 251.4 $\pm$ 46.4 <sup>a</sup>  | 240.8 $\pm$ 49.0 <sup>a</sup>  | 240.6 $\pm$ 44.2 <sup>a</sup> | 232.1 $\pm$ 56.0 <sup>a,*</sup> | 244.0 $\pm$ 38.9 <sup>a</sup> | 226.0 $\pm$ 35.8 <sup>a</sup> | 241.3 $\pm$ 39.3 <sup>a</sup> |

CHO, carbohydrate; ISO, isomaltulose; SUC, sucrose. Significant within-group differences are characterized by values without a common superscript letter (dependent t test:  $p < 0.05$ ). Significant between-group differences are marked with an asterisk \*(independent sample t-test:  $p < 0.05$ ).

**Table S3** Changes in macronutrient intakes at week 4, week 8 and week 12 compared to baseline (mean  $\pm$  SD).

|                          | ISO                     |                         |                               | SUC                     |                         |                             |
|--------------------------|-------------------------|-------------------------|-------------------------------|-------------------------|-------------------------|-----------------------------|
|                          | $\Delta$ wk4 – baseline | $\Delta$ wk8 – baseline | $\Delta$ wk12 – baseline      | $\Delta$ wk4 – baseline | $\Delta$ wk8 – baseline | $\Delta$ wk12 – baseline    |
| $\Delta$ Protein (g/day) | -9.1 $\pm$ 25.5         | -13.6 $\pm$ 30.2        | -15.7 $\pm$ 27.0 <sup>*</sup> | 3.8 $\pm$ 20.4          | -1.1 $\pm$ 24.1         | 3.4 $\pm$ 16.7 <sup>*</sup> |
| $\Delta$ Fat (g/day)     | -32.1 $\pm$ 34.1        | -37.0 $\pm$ 29.3        | -40.0 $\pm$ 25.8              | -25.1 $\pm$ 26.2        | -30.6 $\pm$ 19.1        | -33.1 $\pm$ 18.3            |
| $\Delta$ CHO (g/day)     | -11.2 $\pm$ 67.9        | -21.8 $\pm$ 63.4        | -21.9 $\pm$ 64.7              | 11.8 $\pm$ 69.6         | -11.2 $\pm$ 53.8        | 9.1 $\pm$ 56.3              |

CHO, carbohydrate; ISO, isomaltulose; SUC, sucrose. No within-group differences were observed (paired t-test:  $p < 0.05$ ). Significant between-group differences are marked with an asterisk \*(independent sample t-test:  $p < 0.05$ ).

**Table 4.** Basal characteristics of blood pressure, blood glucose and blood lipids at baseline, week 4, week 8 and week 12 (mean  $\pm$  SD).

|                      | Isomaltulose                                  |                            |                              |                            | Sucrose                                       |                            |                            |                            |
|----------------------|-----------------------------------------------|----------------------------|------------------------------|----------------------------|-----------------------------------------------|----------------------------|----------------------------|----------------------------|
|                      | Baseline                                      | Week 4                     | Week 8                       | Week 12                    | Baseline                                      | Week 4                     | Week 8                     | Week 12                    |
| Systolic BP (mm Hg)  | <u>121 <math>\pm</math> 12</u> <sup>a,*</sup> | 119 $\pm$ 14 <sup>a</sup>  | 120 $\pm$ 12 <sup>a</sup>    | 119 $\pm$ 12 <sup>a</sup>  | <u>129 <math>\pm</math> 15</u> <sup>a,*</sup> | 122 $\pm$ 9 <sup>b</sup>   | 123 $\pm$ 14 <sup>b</sup>  | 123 $\pm$ 15 <sup>b</sup>  |
| Diastolic BP (mm Hg) | 81 $\pm$ 8 <sup>a</sup>                       | 77 $\pm$ 12 <sup>a</sup>   | 78 $\pm$ 9 <sup>a</sup>      | 78 $\pm$ 9 <sup>a</sup>    | 84 $\pm$ 11 <sup>a</sup>                      | 81 $\pm$ 11 <sup>a</sup>   | 83 $\pm$ 12 <sup>a</sup>   | 82 $\pm$ 13 <sup>a</sup>   |
| FBG (mmol/L)         | 4.4 $\pm$ 0.4 <sup>a</sup>                    | 4.5 $\pm$ 0.6 <sup>a</sup> | 4.5 $\pm$ 0.7 <sup>a</sup>   | 4.4 $\pm$ 0.6 <sup>a</sup> | 4.2 $\pm$ 0.5 <sup>a</sup>                    | 4.2 $\pm$ 0.9 <sup>a</sup> | 4.5 $\pm$ 0.6 <sup>a</sup> | 4.4 $\pm$ 0.4 <sup>a</sup> |
| Cholesterol (mmol/L) | 4.4 $\pm$ 1.1 <sup>a</sup>                    | 4.4 $\pm$ 1.0 <sup>a</sup> | 4.3 $\pm$ 1.0 <sup>a</sup>   | 4.6 $\pm$ 0.8 <sup>a</sup> | 4.9 $\pm$ 1.3 <sup>a</sup>                    | 4.6 $\pm$ 1.2 <sup>a</sup> | 4.6 $\pm$ 1.0 <sup>a</sup> | 4.6 $\pm$ 1.0 <sup>a</sup> |
| TG (mmol/L)          | 1.5 $\pm$ 0.5 <sup>a,b</sup>                  | 1.4 $\pm$ 0.4 <sup>a</sup> | 1.3 $\pm$ 0.5 <sup>b,c</sup> | 1.2 $\pm$ 0.3 <sup>c</sup> | 1.4 $\pm$ 0.6 <sup>a</sup>                    | 1.7 $\pm$ 0.9 <sup>a</sup> | 1.7 $\pm$ 1.2 <sup>a</sup> | 1.6 $\pm$ 1.3 <sup>a</sup> |

BP, blood pressure; FBG, fasting blood glucose; TG, triglycerides. Significant within-group differences are characterized by values without a common superscript letter (dependent t test:  $p < 0.05$ ). Significant between-group differences are marked with an asterisk\* (independent sample t-test/Mann-Whitney U test:  $p < 0.05$ ).
